# Supplementary material for: One-dimensional amorphous porous iridium–ruthenium oxide for efficient acidic oxygen evolution reaction
Source: Royal Society of Chemistry journal article supplement (doi:10.1039/d3ta04597h), 2023-01-01
Supplement: d3ta04597h1.pdf [file d3ta04597h1.pdf]

## Supporting information

# One Dimensional Amorphous Porous Iridium-Ruthenium Oxide for Efficient Acidic Oxygen Evolution Reaction

Lamei Li,<sup>§,a</sup> Zifang Cheng,<sup>§,a</sup> Jiaqi Su,<sup>a</sup> Beibei Song,<sup>a</sup> Hao Yu,<sup>b</sup> Yujin Ji,<sup>\*,b</sup> Qi Shao,<sup>\*,a</sup>  
and Jianmei Lu<sup>\*,a</sup>

<sup>a</sup> College of Chemistry, Chemical Engineering and Materials Science, Soochow University, Jiangsu, 215123, China. E-mails: qshao@suda.edu.cn; lujm@suda.edu.cn

<sup>b</sup> College of Chemistry, Institute of Functional Nano & Soft Materials (FUNSOM), Soochow University, Jiangsu, 215123, China. E-mails: yjji@suda.edu.cn

§ These authors contributed equally to this work.

**This PDF file includes:**  
Supplementary Figure S1 to S21  
Supplementary Table S1

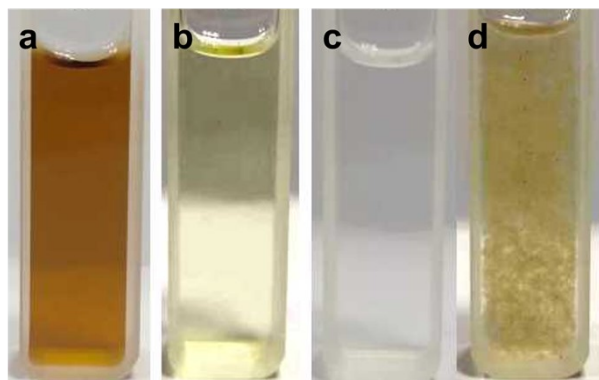

**Figure S1.** Photographs of reaction mixture at different stages of  $\text{SrIr}(\text{OH})_6$  NBs synthesis. (a)  $\text{H}_2\text{IrCl}_6$  aqueous solution, (b)  $\text{H}_2\text{IrCl}_6 + \text{KOH}$  mixture before heating, (c)  $\text{H}_2\text{IrCl}_6 + \text{KOH}$  mixture after 30 min heating under  $70^\circ\text{C}$  and (d) final products of  $\text{SrIr}(\text{OH})_6$  NBs after adding  $\text{SrCl}_2$ .

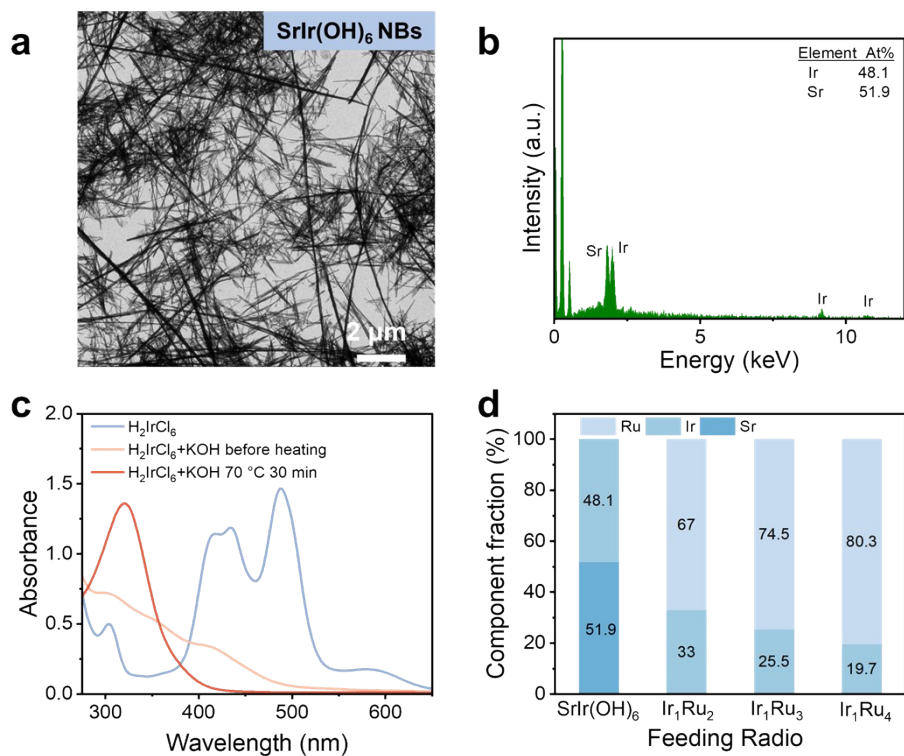

**Figure S2.** (a) TEM image, (b) SEM-EDS spectra of SrIr(OH)<sub>6</sub> NBs, (c) UV-vis spectra of reaction mixtures under different steps and (d) component fractions of different catalysts with different feeding ratios.

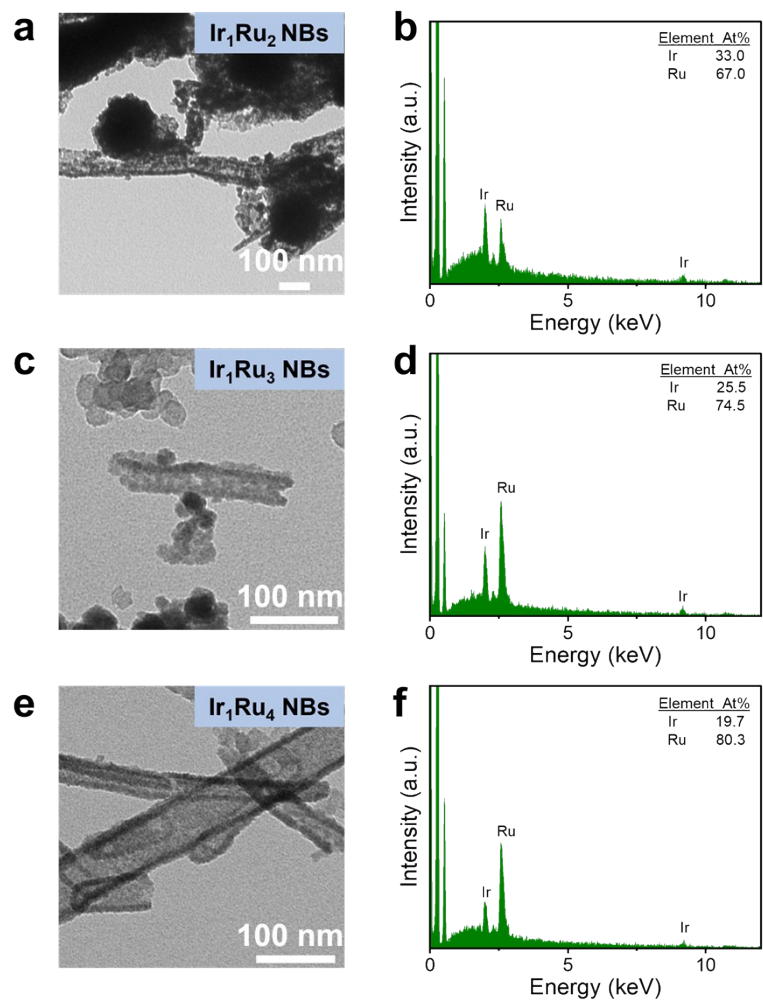

**Figure S3.** (a, c, e) TEM images and (b, d, f) SEM-EDS spectra of Ir<sub>1</sub>Ru<sub>2</sub> NBs, Ir<sub>1</sub>Ru<sub>3</sub> NBs and Ir<sub>1</sub>Ru<sub>4</sub> NBs.

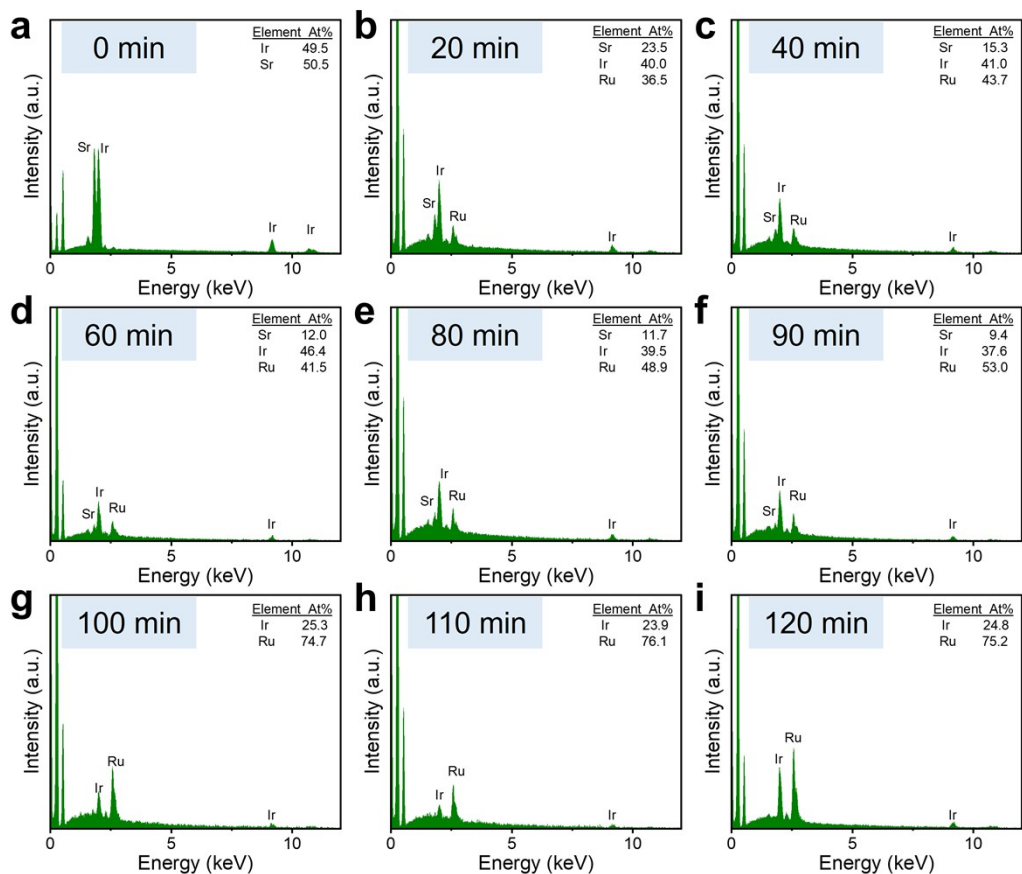

**Figure S4.** SEM-EDS spectra of Ir<sub>1</sub>Ru<sub>3</sub> NBs in the time-tracking experiment at (a) 0 min, (b) 20 min, (c) 40 min, (d) 60 min, (e) 80 min, (f) 90 min, (g) 100 min, (h) 110 min and (i) 120 min.

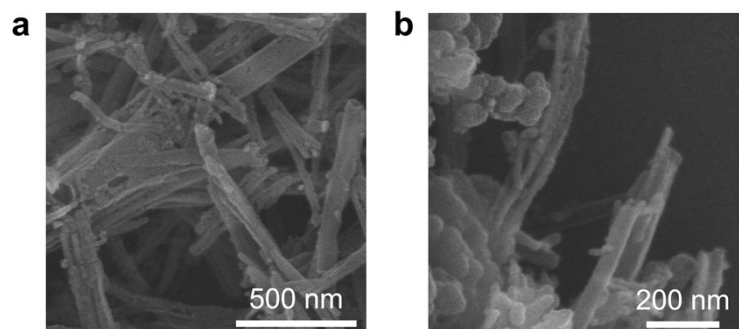

**Figure S5.** (a, b) SEM images of Am-Ir<sub>1</sub>Ru<sub>3</sub>O<sub>8</sub> NBs-250.

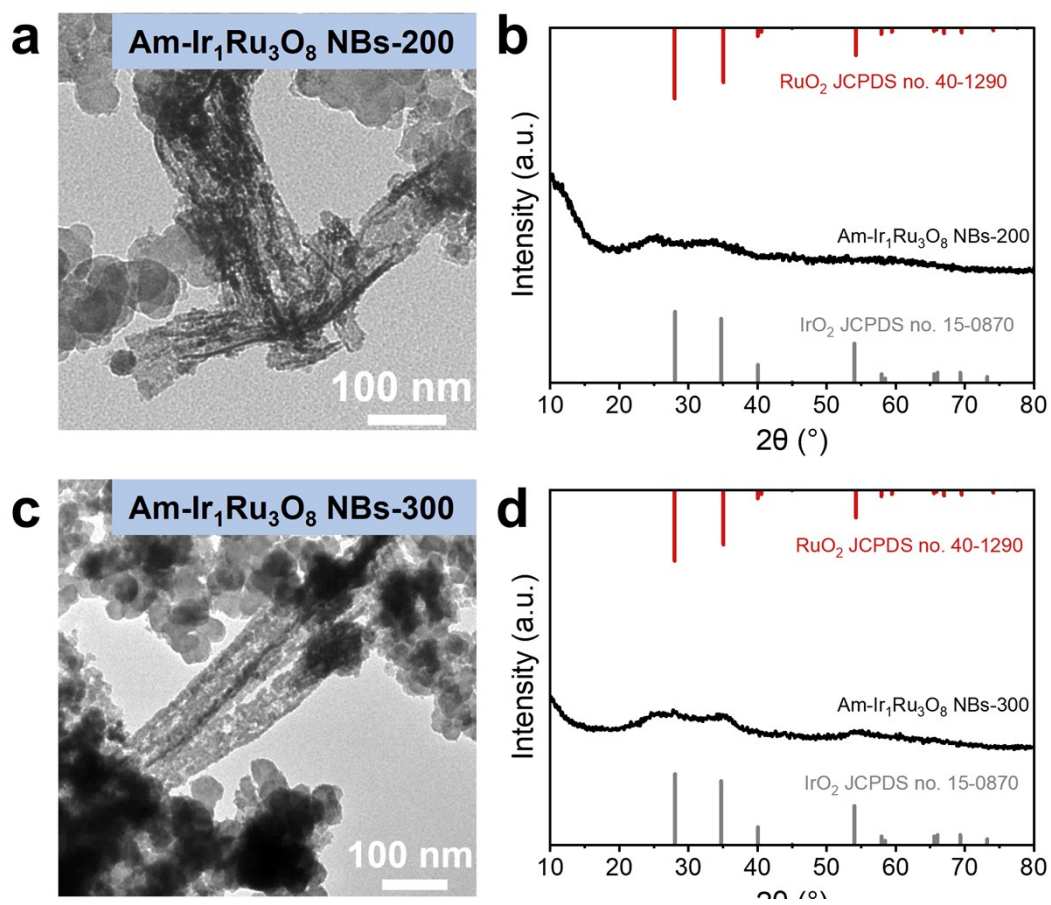

**Figure S6.** (a, c) TEM images and (b, d) PXRD patterns of Am-Ir<sub>1</sub>Ru<sub>3</sub>O<sub>8</sub> NBs-200 and Am-Ir<sub>1</sub>Ru<sub>3</sub>O<sub>8</sub> NBs-300.

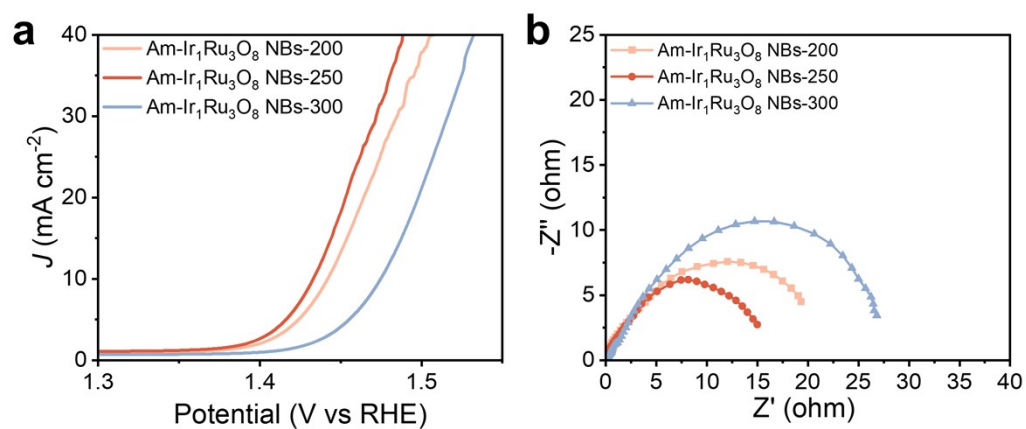

**Figure S7.** (a) The LSV curves and (b) nyquist plots recorded of Am-Ir<sub>1</sub>Ru<sub>3</sub>O<sub>8</sub> NBs-200, Am-Ir<sub>1</sub>Ru<sub>3</sub>O<sub>8</sub> NBs-250 and Am-Ir<sub>1</sub>Ru<sub>3</sub>O<sub>8</sub> NBs-300.



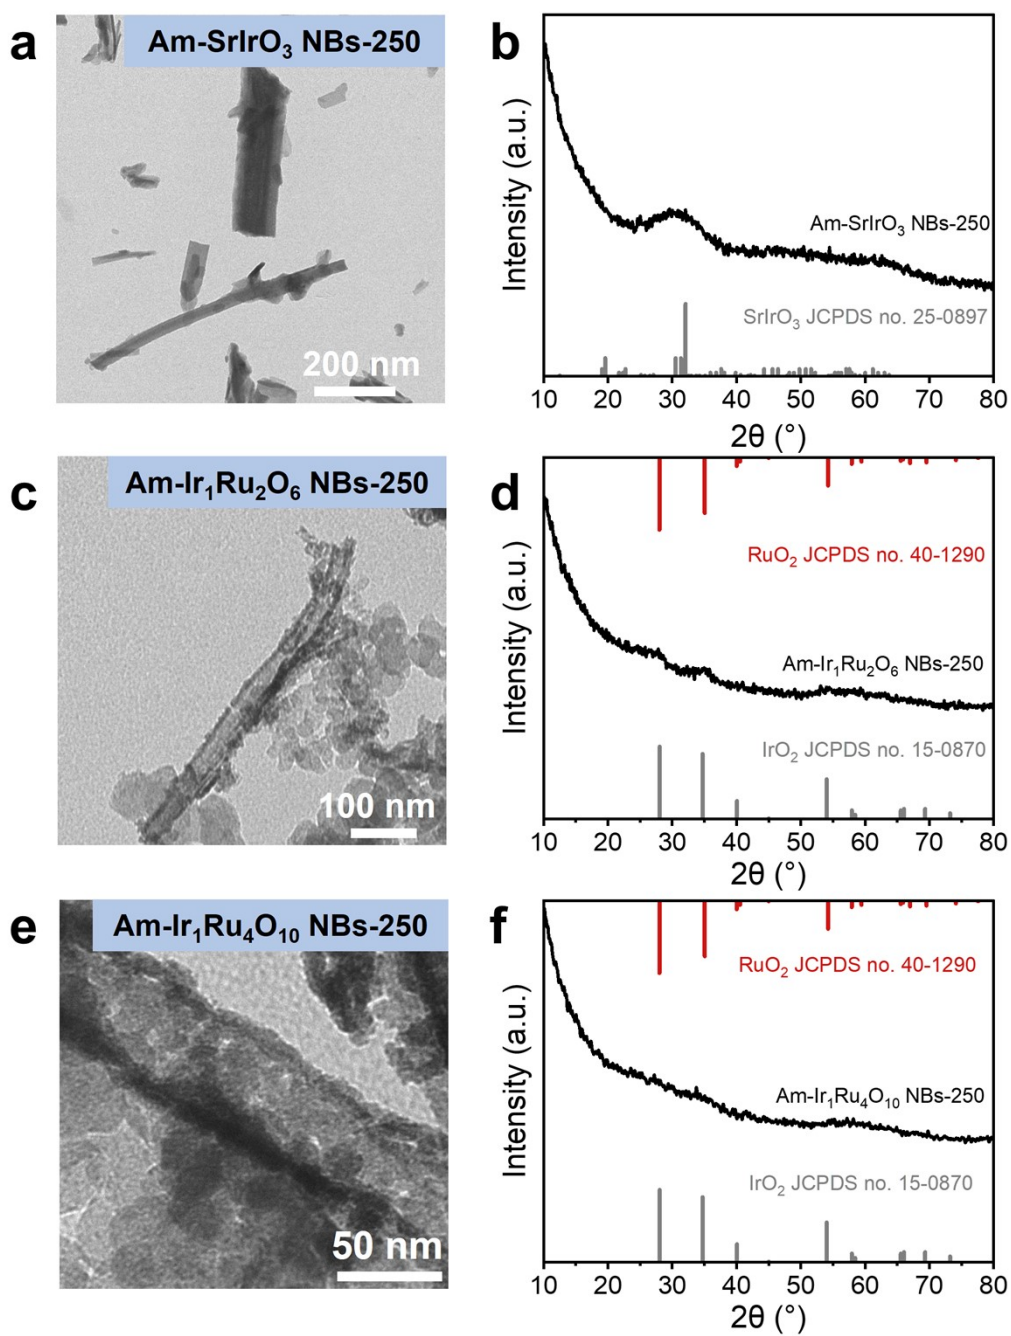

**Figure S8.** (a, c, e) TEM images and (b, d, f) PXRD patterns of Am-SrIrO<sub>3</sub> NBs-250, Am-Ir<sub>1</sub>Ru<sub>2</sub>O<sub>6</sub> NBs-250 and Am-Ir<sub>1</sub>Ru<sub>4</sub>O<sub>10</sub> NBs-250.

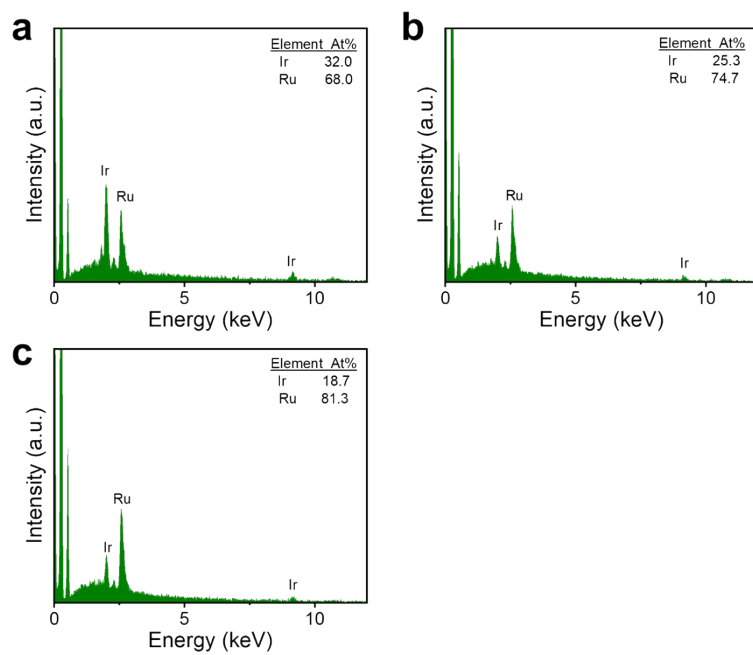

**Figure S9.** (a, b, c) SEM-EDS spectra of Am-Ir<sub>1</sub>Ru<sub>2</sub>O<sub>6</sub> NBS-250, Am-Ir<sub>1</sub>Ru<sub>3</sub>O<sub>8</sub> NBS-250 and Am-Ir<sub>1</sub>Ru<sub>4</sub>O<sub>10</sub> NBS-250.

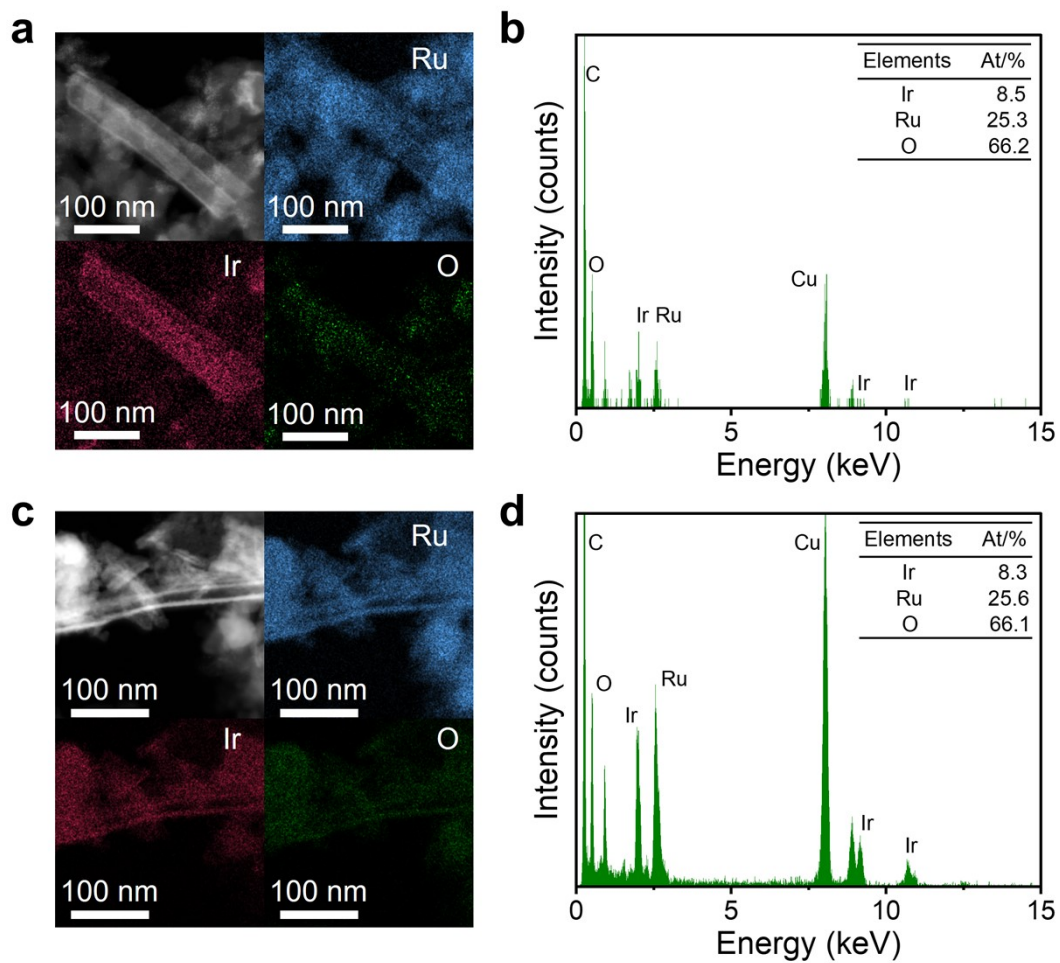

**Figure S10.** (a, c) HAADF-STEM-EDS mapping and (b, d) HAADF-STEM-EDS of Am-Ir<sub>1</sub>Ru<sub>3</sub>O<sub>8</sub> NBs-250.

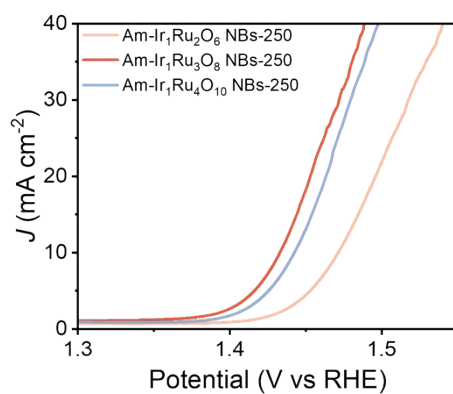

**Figure S11.** The OER polarization curves of Am-Ir<sub>1</sub>Ru<sub>2</sub>O<sub>6</sub> NBS-250, Am-Ir<sub>1</sub>Ru<sub>3</sub>O<sub>8</sub> NBS-250 and Am-Ir<sub>1</sub>Ru<sub>4</sub>O<sub>10</sub> NBS-250.

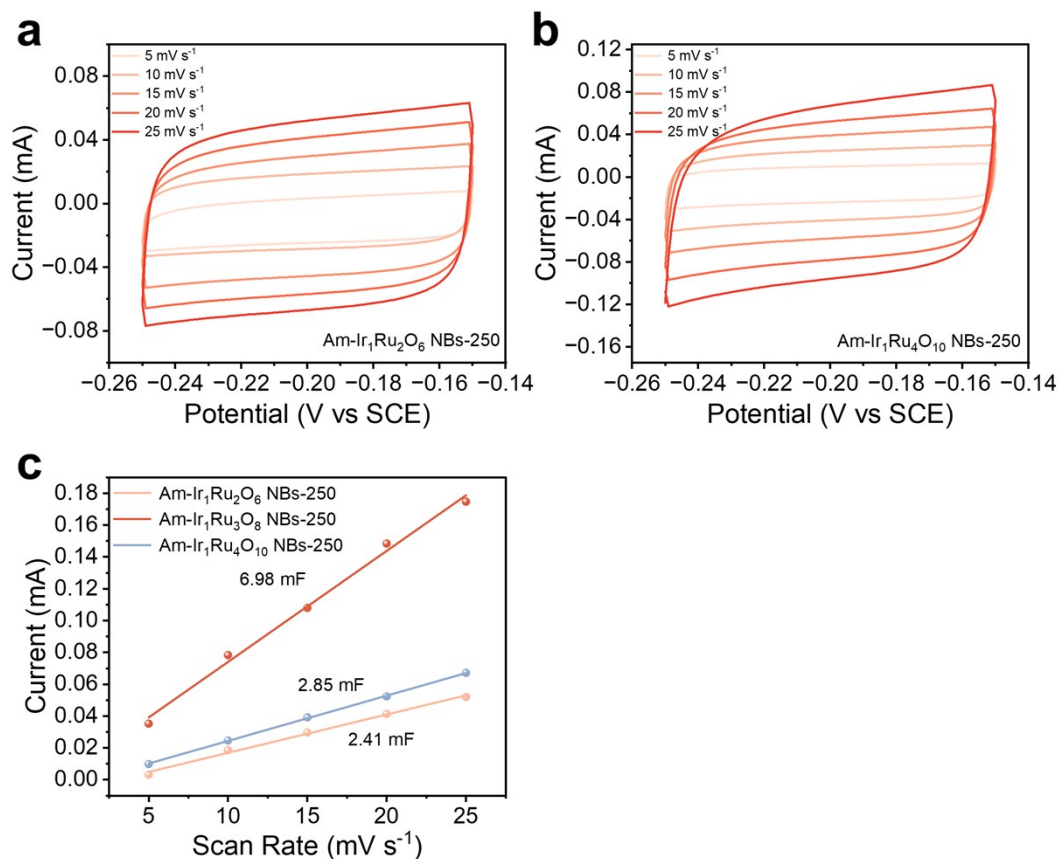

**Figure S12.** CV curves scanned in the non-faradaic potential window of -0.15 V to -0.25 V at different scan rates for (a) Am-Ir<sub>1</sub>Ru<sub>2</sub>O<sub>6</sub> NBS-250, (b) Am-Ir<sub>1</sub>Ru<sub>4</sub>O<sub>10</sub> NBS-250 and (c) charging current plotted against scan rate of Am-Ir<sub>1</sub>Ru<sub>2</sub>O<sub>6</sub> NBS-250, Am-Ir<sub>1</sub>Ru<sub>3</sub>O<sub>8</sub> NBS-250 and Am-Ir<sub>1</sub>Ru<sub>4</sub>O<sub>10</sub> NBS-250. The slope of the fitted line represents C<sub>dl</sub>.

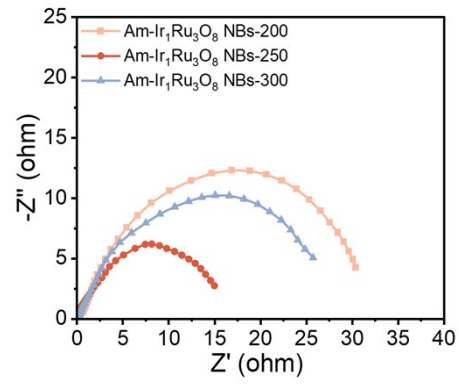

**Figure S13.** Nyquist plots of  $\text{Am-Ir}_1\text{Ru}_2\text{O}_3$  NBs-250,  $\text{Am-Ir}_1\text{Ru}_3\text{O}_8$  NBs-250 and  $\text{Am-Ir}_1\text{Ru}_4\text{O}_{10}$  NBs-250.

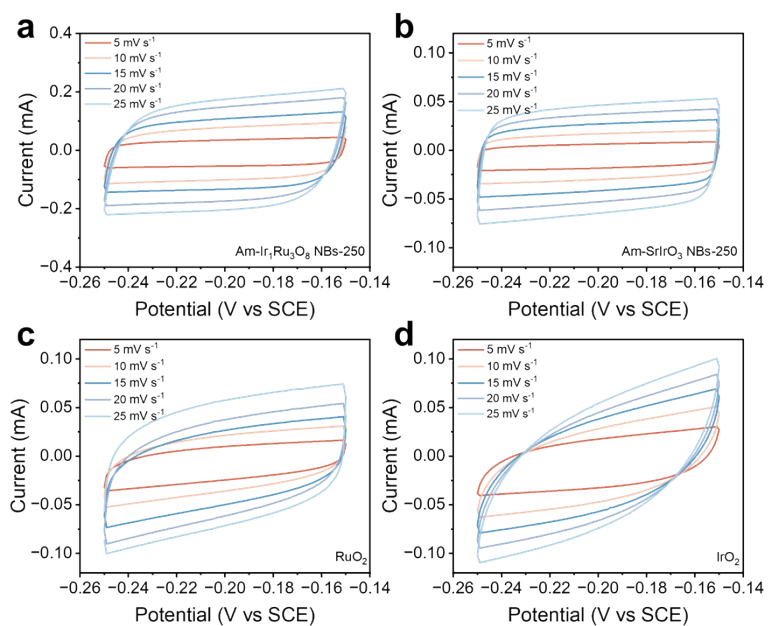

**Figure S14.** CV curves scanned in the non-faradaic potential window of -0.25 V to -0.15 V at different scan rates for (a) Am-Ir<sub>1</sub>Ru<sub>3</sub>O<sub>8</sub> NBS-250, (b) Am-SrIrO<sub>3</sub> NBS-250 and (c) RuO<sub>2</sub> and (d) IrO<sub>2</sub>.

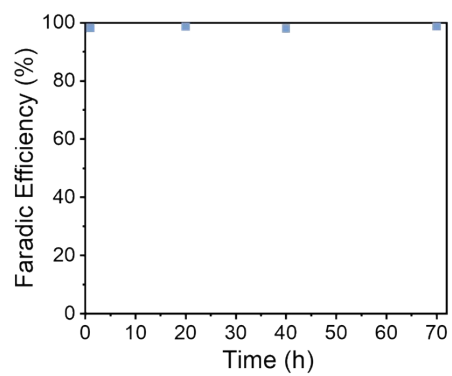

**Figure S15.** Faraday Efficiency of Am-Ir<sub>1</sub>Ru<sub>3</sub>O<sub>8</sub> NBS-250 during stability test.



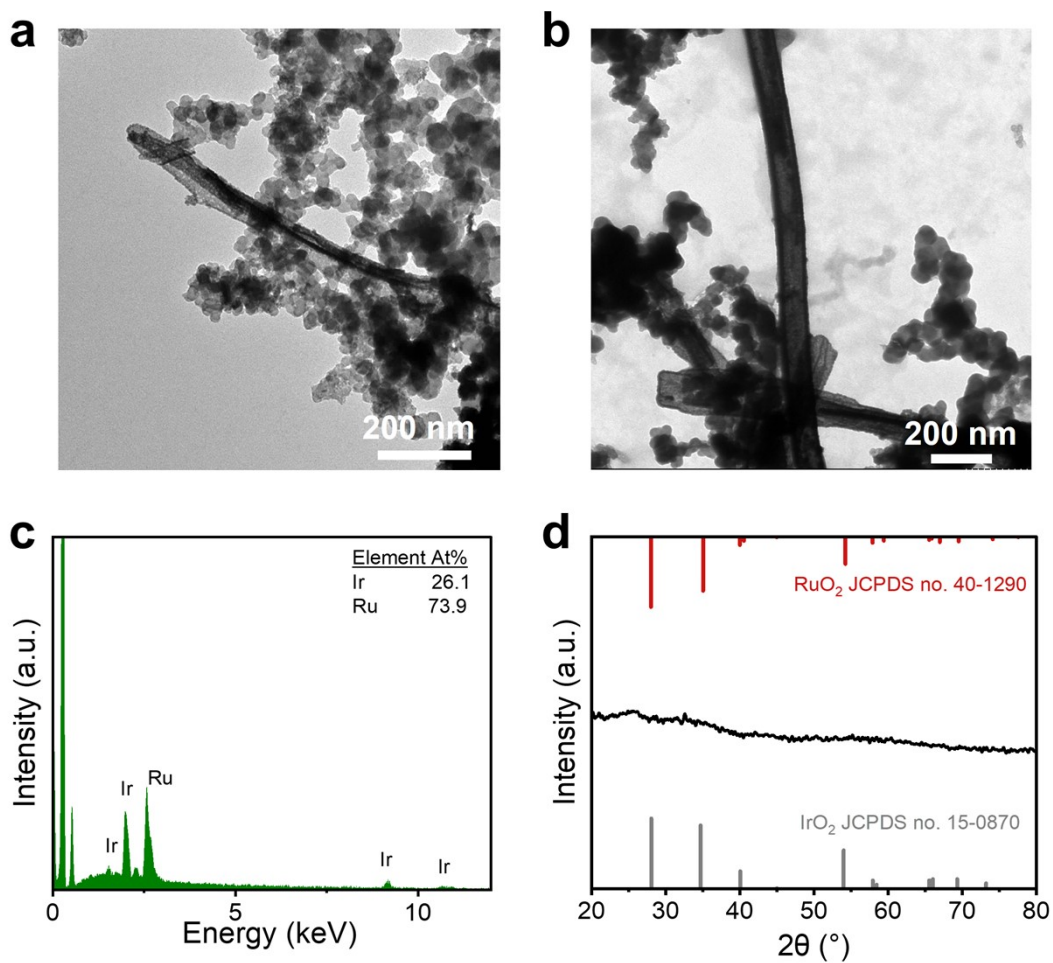

**Figure S16.** (a) TEM of Am-Ir<sub>1</sub>Ru<sub>3</sub>O<sub>8</sub> NBs-250 before stability test, (b) TEM, (c) SEM-EDS spectra and (d) XRD of Am-Ir<sub>1</sub>Ru<sub>3</sub>O<sub>8</sub> NBs-250 after stability test.

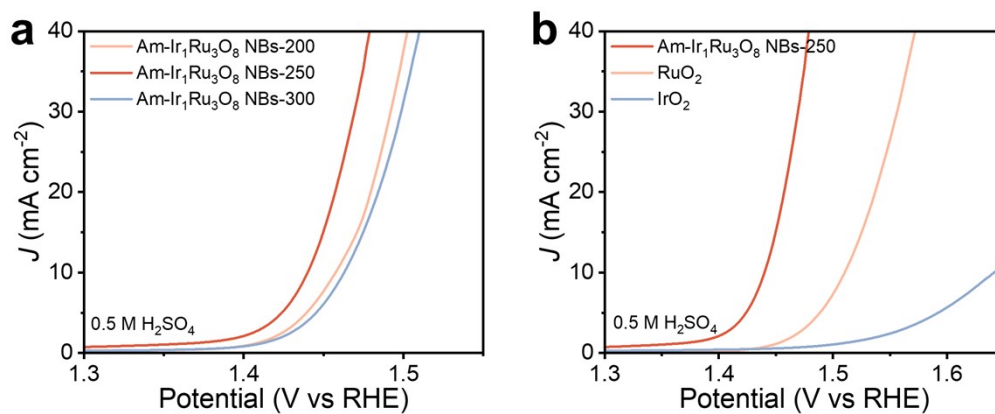

**Figure S17.** LSV curves of (a) Am-Ir<sub>1</sub>Ru<sub>3</sub>O<sub>8</sub> NBS-200, Am-Ir<sub>1</sub>Ru<sub>3</sub>O<sub>8</sub> NBS-250 and Am-Ir<sub>1</sub>Ru<sub>3</sub>O<sub>8</sub> NBS-300 and (b) Am-Ir<sub>1</sub>Ru<sub>3</sub>O<sub>8</sub> NBS-200, RuO<sub>2</sub> and IrO<sub>2</sub> in 0.5 M H<sub>2</sub>SO<sub>4</sub>.

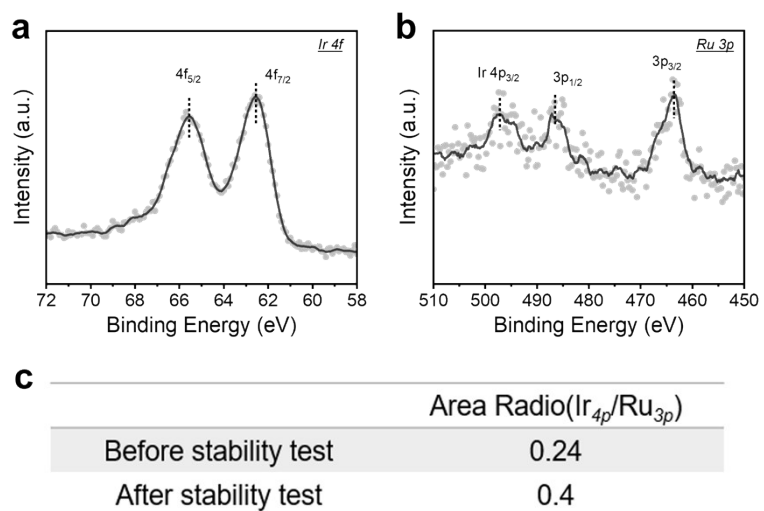

**Figure S18.** (a) Ir  $4f$ , (b) Ru  $3p$  XPS spectra and (c) the ratio of Ir $4p$  to Ru $3p$  of Am- $Ir_1Ru_3O_8$  NBs-250 after stability test.

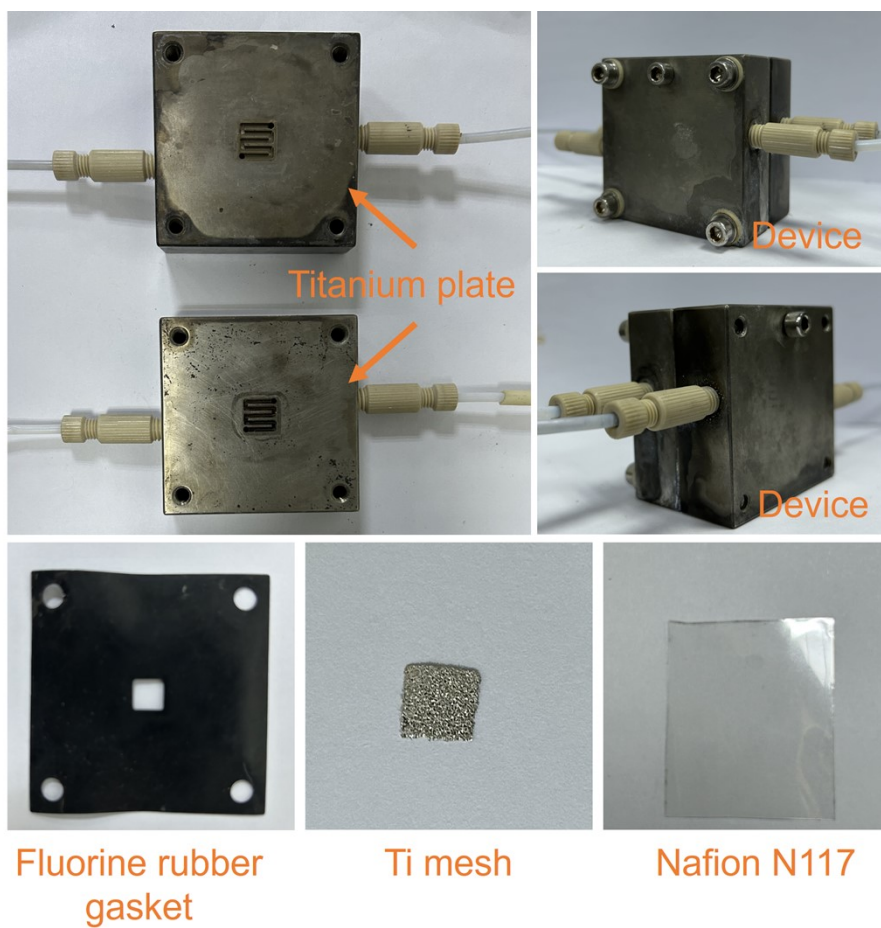

**Figure S19.** The photographs of the PEM electrolyzer.

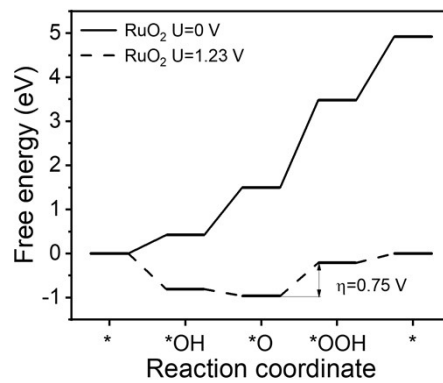

**Figure S20.** Free energy evolution diagram of four-electron OER on RuO<sub>2</sub> (110) surface.

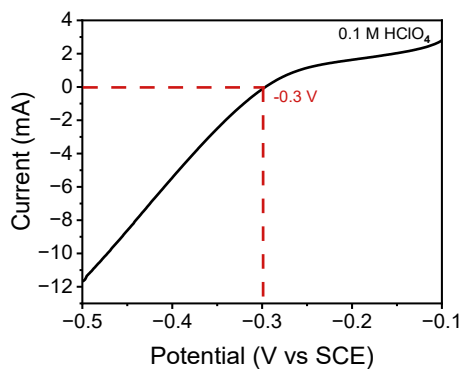

**Figure S21.** Potential calibration of the saturated calomel electrode (SCE) in 0.1 M HClO<sub>4</sub> electrolyte. The calibration of SCE reference electrode is performed in a standard three-electrode system with polished Pt wires as the working and counter electrodes, and the SCE as the reference electrode. Electrolytes are pre-purged and saturated with high purity H<sub>2</sub>. Linear scanning voltammetry (LSV) is then run at a scan rate of 5 mV s<sup>-1</sup>, and the potential at which the current crossed zero is taken to be the thermodynamic potential (vs. SCE) for the hydrogen electrode reactions. For example, in 0.1 M HClO<sub>4</sub>, the zero current point is at -0.3 V, so  $E(\text{RHE}) = E(\text{SCE}) + 0.3 \text{ V}$ .

**Table S1.** Comparison of previous reported Ru or Ir-based catalysts in acidic electrolyte.

| Catalyst                                                    | Electrolyte                           | $\eta$ (mV)                        | Ref.                                   |
|-------------------------------------------------------------|---------------------------------------|------------------------------------|----------------------------------------|
| <b>Am-Ir<sub>1</sub>Ru<sub>3</sub>O<sub>8</sub> NBS-250</b> | <b>0.1 M HClO<sub>4</sub></b>         | <b>204 @ 10 mA cm<sup>-2</sup></b> | <b>This Work</b>                       |
| Nb <sub>0.1</sub> Ru <sub>0.9</sub> O <sub>2</sub>          | 0.5 M H <sub>2</sub> SO <sub>4</sub>  | 204 @ 10 mA cm <sup>-2</sup>       | Joule 2023, 7, 558-573                 |
| Ru <sub>3</sub> Ir <sub>1</sub> O <sub>x</sub>              | 0.5 M H <sub>2</sub> SO <sub>4</sub>  | 231 @ 10 mA cm <sup>-2</sup>       | Adv. Energy Mater. 2021, 11, 2102883   |
| RuIr-NC                                                     | 0.05 M H <sub>2</sub> SO <sub>4</sub> | 165 @ 10 mA cm <sup>-2</sup>       | Nat. Commun. 2021, 12, 1145            |
| AD-HN-Ir                                                    | 0.5 M H <sub>2</sub> SO <sub>4</sub>  | 216 @ 10 mA cm <sup>-2</sup>       | Nat. Commun. 2021, 12, 6118            |
| Ni-RuO <sub>2</sub>                                         | 0.1 M HClO <sub>4</sub>               | 214 @ 10 mA cm <sup>-2</sup>       | Nat. Mater. 2023, 22, 100-108          |
| Ru@IrO <sub>x</sub>                                         | 0.05 M H <sub>2</sub> SO <sub>4</sub> | 282 @ 10 mA cm <sup>-2</sup>       | Chem 2019, 5, 445-459                  |
| RuIr                                                        | 0.5 M H <sub>2</sub> SO <sub>4</sub>  | 239 @ 10 mA cm <sup>-2</sup>       | J. Am. Chem. Soc. 2021, 143, 6482-6490 |
| SrRu                                                        | 0.5 M H <sub>2</sub> SO <sub>4</sub>  | 238 @ 10 mA cm <sup>-2</sup>       | J. Am. Chem. Soc. 2021, 143, 6482-6490 |
| Co-RuIr                                                     | 0.1 M HClO <sub>4</sub>               | 235 @ 10 mA cm <sup>-2</sup>       | Adv. Mater. 2019, 31, 1900510          |
| 6H-SrIrO <sub>3</sub>                                       | 0.5 M H <sub>2</sub> SO <sub>4</sub>  | 248 @ 10 mA cm <sup>-2</sup>       | Nat. Commun. 2018, 9, 5236             |
| RuIr@CoNC                                                   | 0.5 M H <sub>2</sub> SO <sub>4</sub>  | 223 @ 10 mA cm <sup>-2</sup>       | ACS Catal. 2021, 11, 3402-3413         |
| Nano RuO <sub>2</sub>                                       | 0.5 M H <sub>2</sub> SO <sub>4</sub>  | 232 @ 10 mA cm <sup>-2</sup>       | ACS Catal. 2019, 10, 1152-1160         |
| Re-IrO <sub>2</sub>                                         | 0.5 M H <sub>2</sub> SO <sub>4</sub>  | 255 @ 10 mA cm <sup>-2</sup>       | Small 2023, 19, 2207847                |
| AD-HN-Ir                                                    | 0.5 M H <sub>2</sub> SO <sub>4</sub>  | 216 @ 10 mA cm <sup>-2</sup>       | Nat. Commun. 2021, 12, 6118            |
